# Supplementary material for: Metagenomic investigation of bacterial laccases in a straw-amended soil
Source: PeerJ. 2025 Apr 28;13:e19327. doi: 10.7717/peerj.19327 (PMC12045287; doi:10.7717/peerj.19327)
Supplement: Supplemental Information 3 [file peerj-13-19327-s003.xls]

## Sheet: optimal temperature
	70℃	60℃	55℃	50℃	45℃	40℃	30℃
1		0.222		0.275		0.251	0.191
2		0.258		0.296		0.21	0.185
3		0.267		0.316		0.225	0.169
blank		0.043		0.049		0.048	0.046
1	0.059		0.131	0.169	0.154
2	0.065		0.145	0.161	0.138
3	0.056		0.16	0.153	0.137
blank	0.048		0.051	0.051	0.052

## Sheet: optimal pH
	Sodium citrate buffer				Na2HPO4-KH2PO4
	pH3.0	pH4.0	pH5.0	pH6.0	pH6.0	pH7.0	pH8.0
1	0.065	0.146	0.474	0.313	0.222	0.126	0.088
2	0.063	0.163	0.442	0.257	0.248	0.123	0.09
3	0.066	0.155	0.452	0.29	0.24	0.122	0.09
blank	0.056	0.051	0.046	0.044	0.048	0.051	0.053

## Sheet: thermal stability
		50℃	40℃			Oringinal
15min	1	0.332	0.387			1	0.442
	2	0.309	0.413			2	0.415
	3	0.295	0.409			3	0.428
	blank	0.045	0.042			blank	0.042
30min	1	0.246	0.378
	2	0.236	0.406
	3	0.224	0.389
	blank	0.042	0.042
45min	1	0.168	0.345
	2	0.181	0.365
	3	0.169	0.329
	blank	0.042	0.042
60min	1	0.143	0.307
	2	0.132	0.322
	3	0.136	0.292
	blank	0.042	0.043

## Sheet: pH stability
	Sodium citrate buffer				Na2HPO4-KH2PO4			Tris-HCl
	pH3.0	pH4.0	pH5.0	pH6.0	pH6.0	pH7.0	pH8.0	pH8.0	pH8.5	pH9.0
1	0.047	0.053	0.161	0.233	0.208	0.252	0.247
2	0.046	0.048	0.139	0.227	0.23	0.252	0.251
3	0.046	0.051	0.133	0.195	0.207	0.243	0.234
blank	0.043
			0.162	0.224	0.207	0.226	0.223	0.182	0.201	0.225
			0.154	0.184	0.167	0.222	0.188	0.185	0.202	0.215
			0.143	0.219	0.198	0.215	0.215	0.198	0.192	0.208
blank			0.048

## Sheet: NaCl
	0	1	10	50	100	250	500	1000	mM
1	0.582	0.553	0.506	0.392	0.327	0.265	0.151	0.104
2	0.531	0.557	0.496	0.38	0.305	0.284	0.136	0.106
3	0.58	0.57	0.513	0.392	0.278	0.254	0.138	0.108
blank	0.043	0.046	0.041	0.042	0.043	0.044	0.044	0.045

## Sheet: CuSO4
	0	25	50	100	200	500	mM
1	0.569	0.584	0.563	0.57	0.571	0.528
2	0.481	0.508	0.493	0.532	0.508	0.55
3	0.503	0.507	0.488	0.5	0.5	0.542
Blank	0.048	0.045	0.048	0.048	0.048	0.047
